# Supplementary material for: C2-domain mediated nano-cluster formation increases calcium signaling efficiency
Source: PubMed Central journal article supplement (PMC5093555; doi:10.1038/srep36028), 2016-11-03
Supplement: srep36028-s4.pdf [file srep36028-s4.pdf]

**Title:** C2-domain mediated nano-cluster formation increases calcium signaling efficiency

**Authors:** Mike Bonny<sup>1§</sup>, Xin Hui<sup>2§</sup>, Julia Schweizer<sup>2</sup>, Lars Kaestner<sup>2</sup>, André Zeug<sup>3</sup>, Karsten Kruse<sup>1\*</sup>, Peter Lipp<sup>2\*</sup>

**Affiliations:**

<sup>1</sup>Theoretical Physics, Saarland University, Saarbrücken, Germany.

<sup>2</sup>Institute for Molecular Cell Biology, Medical Faculty, Saarland University, Homburg/Saar, Germany.

<sup>3</sup>Cellular Neurophysiology, Center of Physiology, Hannover Medical School, Hannover, Germany.

§ These authors contributed equally to this work.

\* Shared senior authorship.

Correspondence to: [peter.lipp@uks.eu](mailto:peter.lipp@uks.eu) or [k.kruse@physik.uni-saarland.de](mailto:k.kruse@physik.uni-saarland.de)

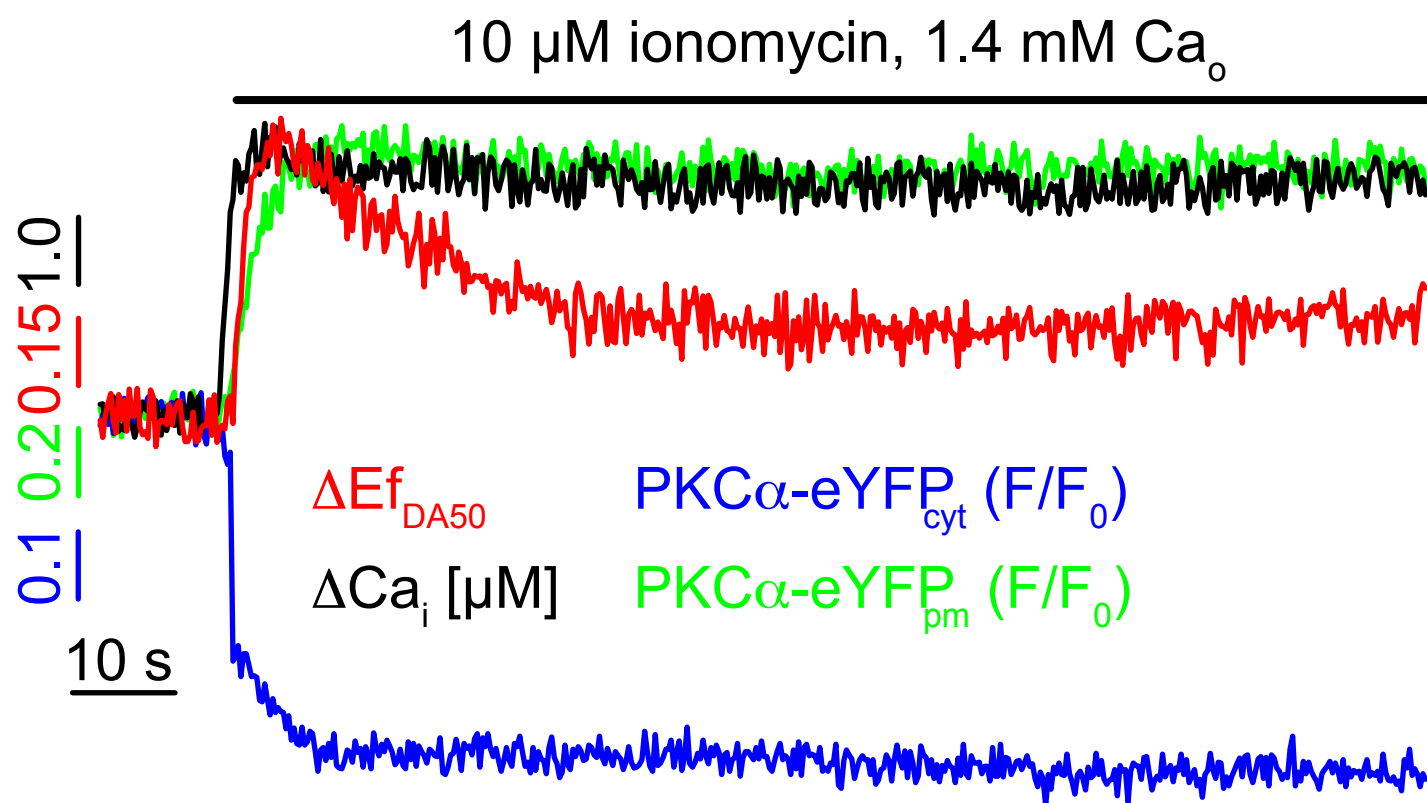

**Spontaneous FRET decay in the presence of prolonged increases in  $[\text{Ca}^{2+}]_i$ .** After an initial peak in FRET (red) spontaneous FRET decrease occurs eventually resulting in a new steady state value. Note, that this FRET decay occurs in the presence of a constant intracellular Ca concentration (black trace) and maintained translocation of PKC $\alpha$  to the plasma membrane (green).

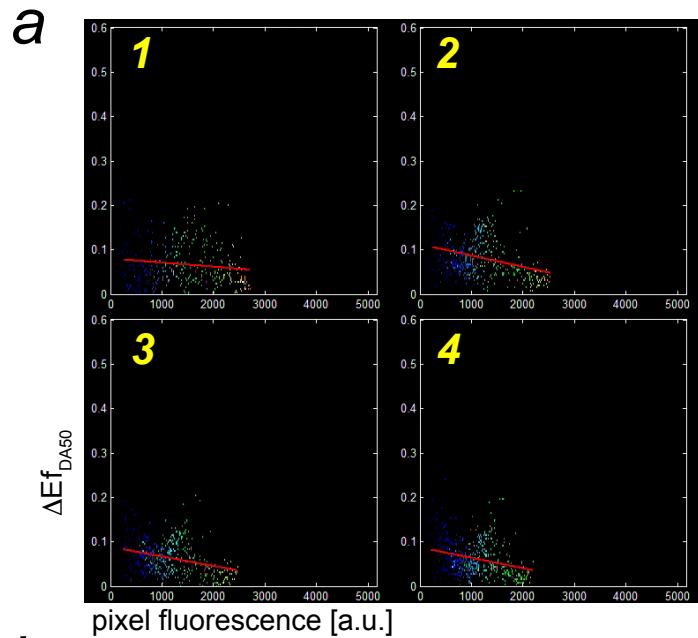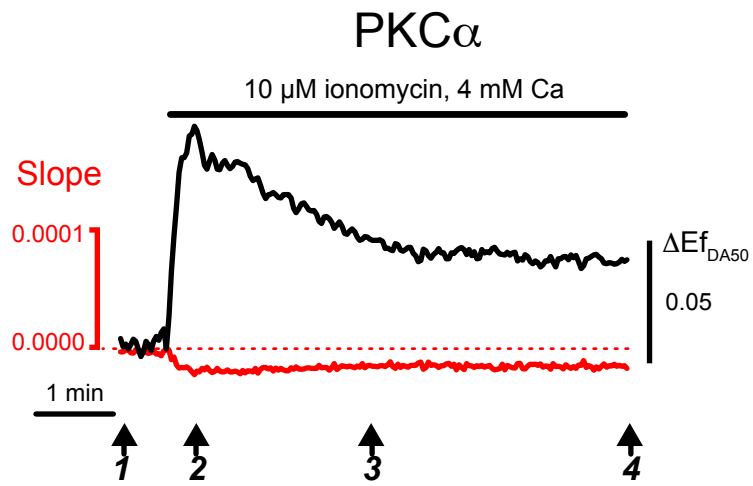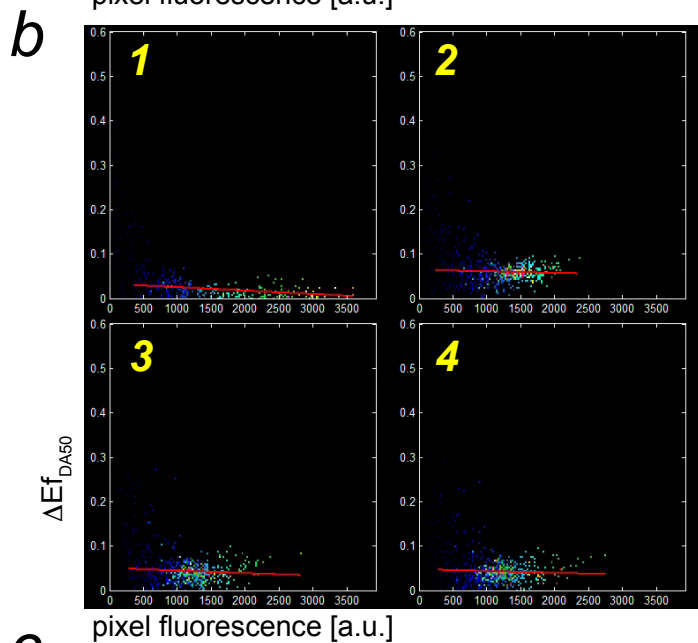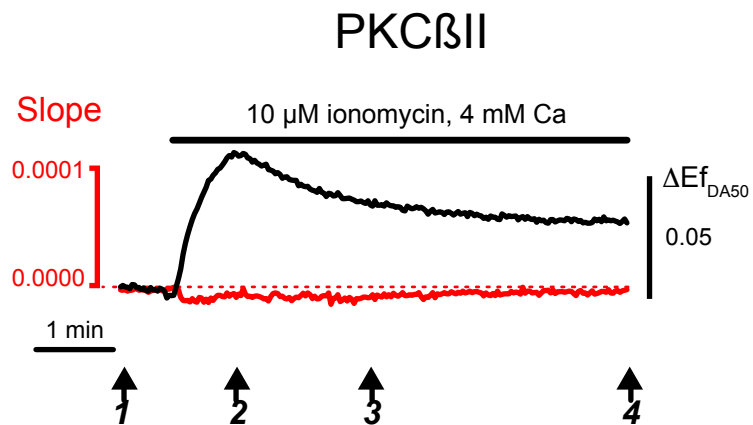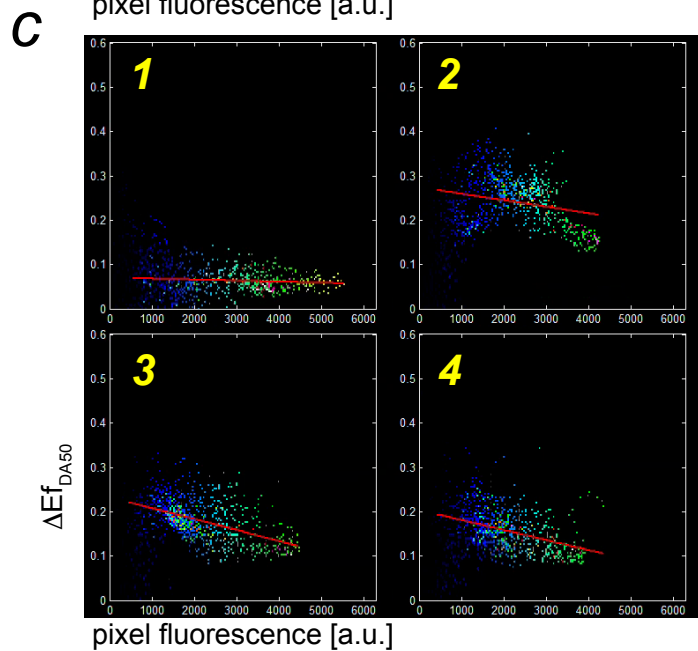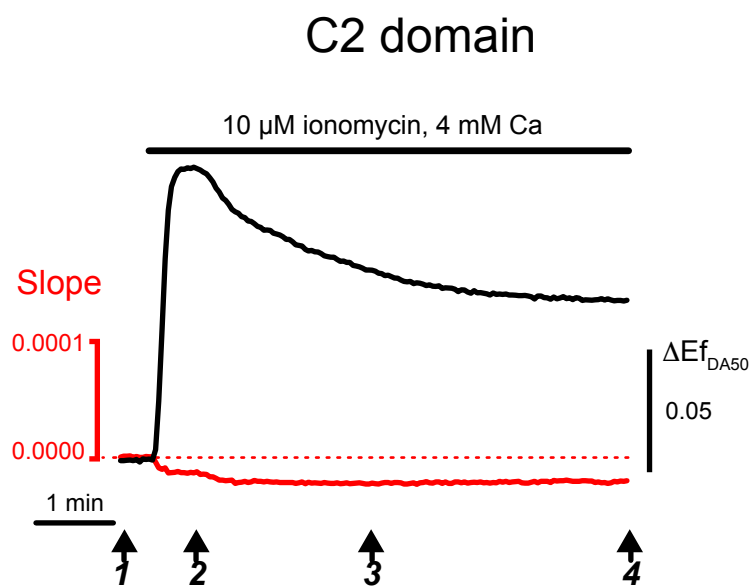

**Molecular crowding is not at the origin of the increased FRET efficiency after Ca<sup>2+</sup>-induced membrane translocation.** Left column presents the FRET efficiency  $E_{f_{DA50}}$  as a function of the pixel fluorescence intensity for HEK cells expressing the CFP and YFP fusion proteins of PKC $\alpha$ (a), PKC $\beta$ ii (b), and C2-domain of PKC $\alpha$  (c). The pixel fluorescence intensity is given as the geometric mean of the donor and the acceptor emission intensities. In each case, distributions acquired at four different times for representative cells are shown. The color of the dots indicates the frequency at which they occurred with warmer color corresponding to higher frequencies. The data were acquired for all pixels in the respective cell regions. Red lines indicate the results of a linear fit. Molecular crowding as the principal reason for the increased FRET efficiency would lead to a positive correlation. Right column: FRET efficiency  $E_{f_{DA50}}$  as a function of time for the cells shown on the left (black curves) and slopes of the linear fits to the data points (red). Black arrows and numbers indicate the selected time points shown on the left. In all cases, the FRET efficiency spontaneously decays and presents a negative correlation with the pixel intensity. Together these results strongly indicate that the increase of the FRET efficiency upon stimulation of membrane translocation is not primarily due to molecular crowding

**a**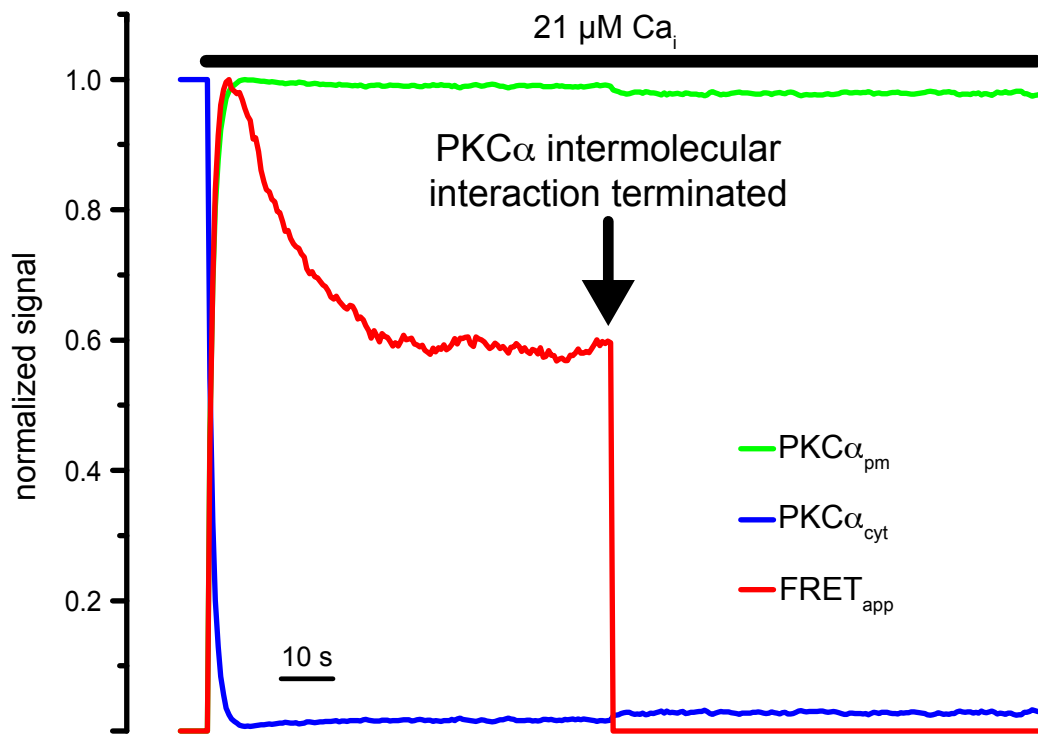**b**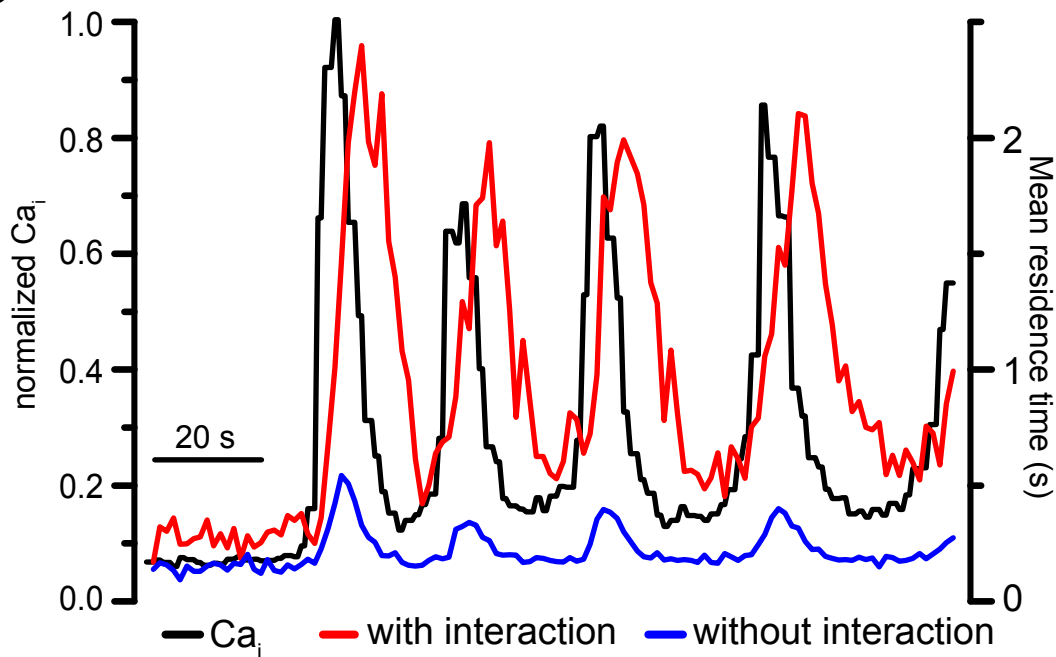

**Comparison of simulation results with and without interparticle interactions.** (a) Concentration of membrane-bound PKC $\alpha$  (green curve), cytosolic PKC $\alpha$  (blue), and the total FRET $_{\text{app}}$  signal (red) for a simulation of an extended elevated  $\text{Ca}_i$  concentration of 21 $\mu\text{M}$ . After 1min, interparticle interactions were switched off. (b) Mean residence time of membrane-bound PKC $\alpha$  with (red curve) and without (blue) interparticle interactions from simulations for the measured oscillatory  $\text{Ca}_i$  signal (black) from Fig. 1d (main text). Parameters are as in Table 1.

a

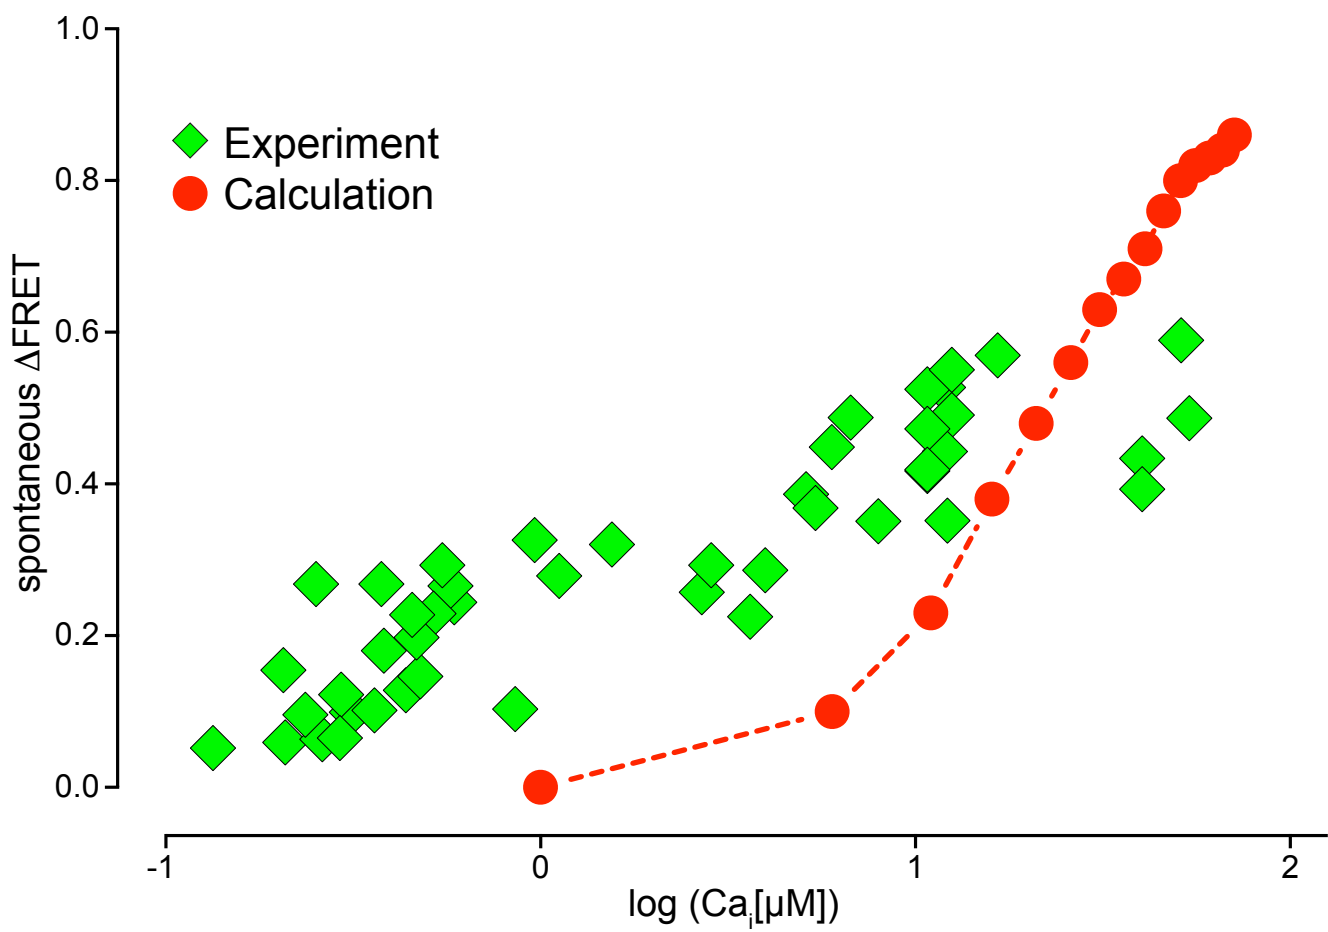

b

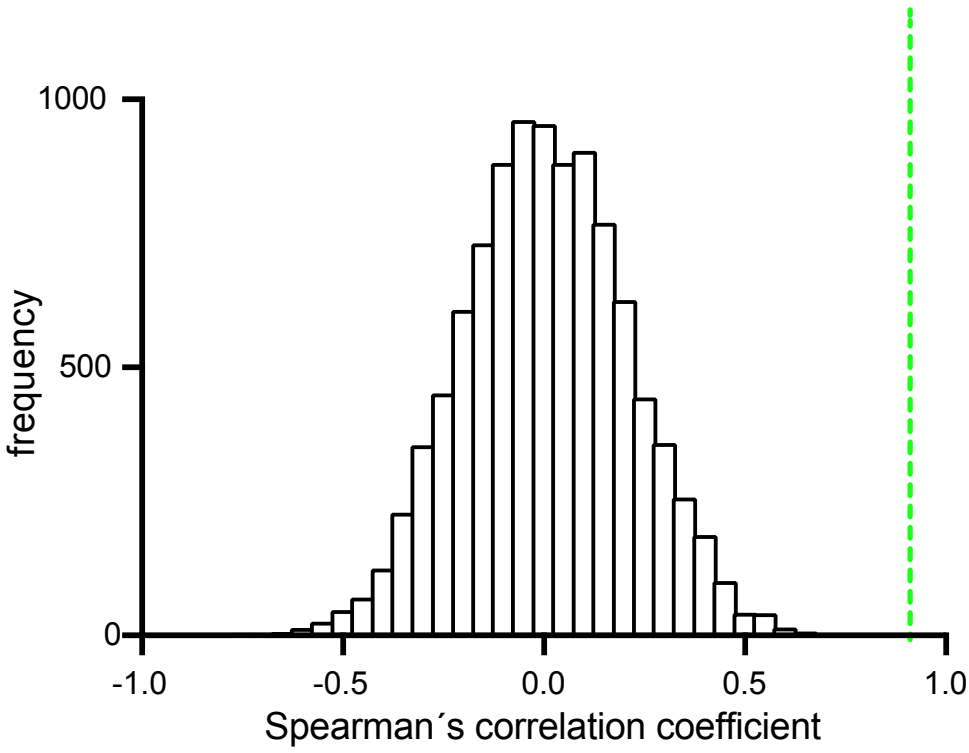

**Analysis of spontaneous FRET decay.** (a) Amplitude of spontaneous  $\Delta FRET$  as a function of prolonged elevated  $Ca_i$  measured in HEK cells (green diamonds) and derived from the stochastic simulations (red circles). (b) Distribution of the Spearman correlation coefficients ( $r$ ) between  $\Delta FRET$  and  $Ca_i$  for 10,000 permutations of the datapairs shown in (a) green diamonds. The dashed green line indicates the correlation level for the measured relationship displayed in (a).

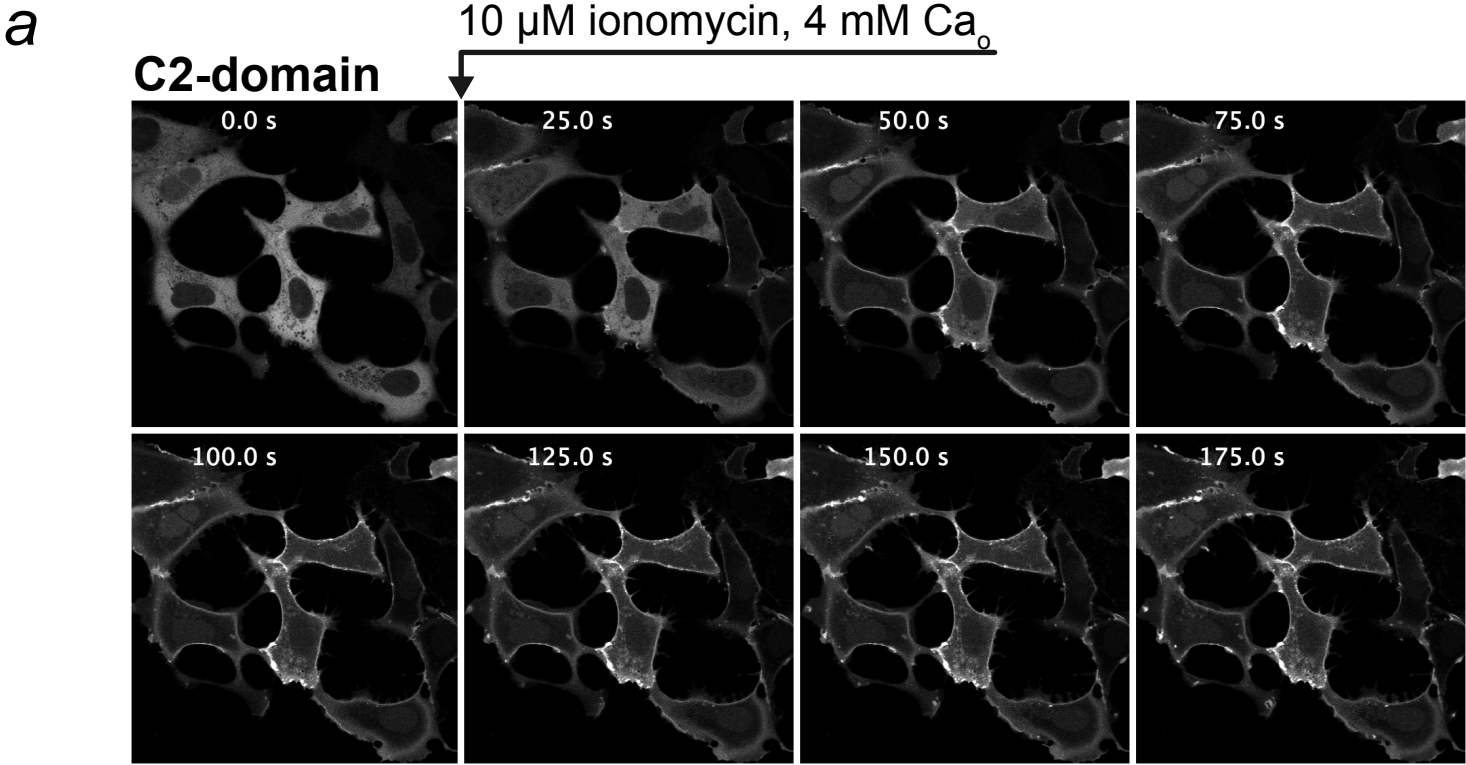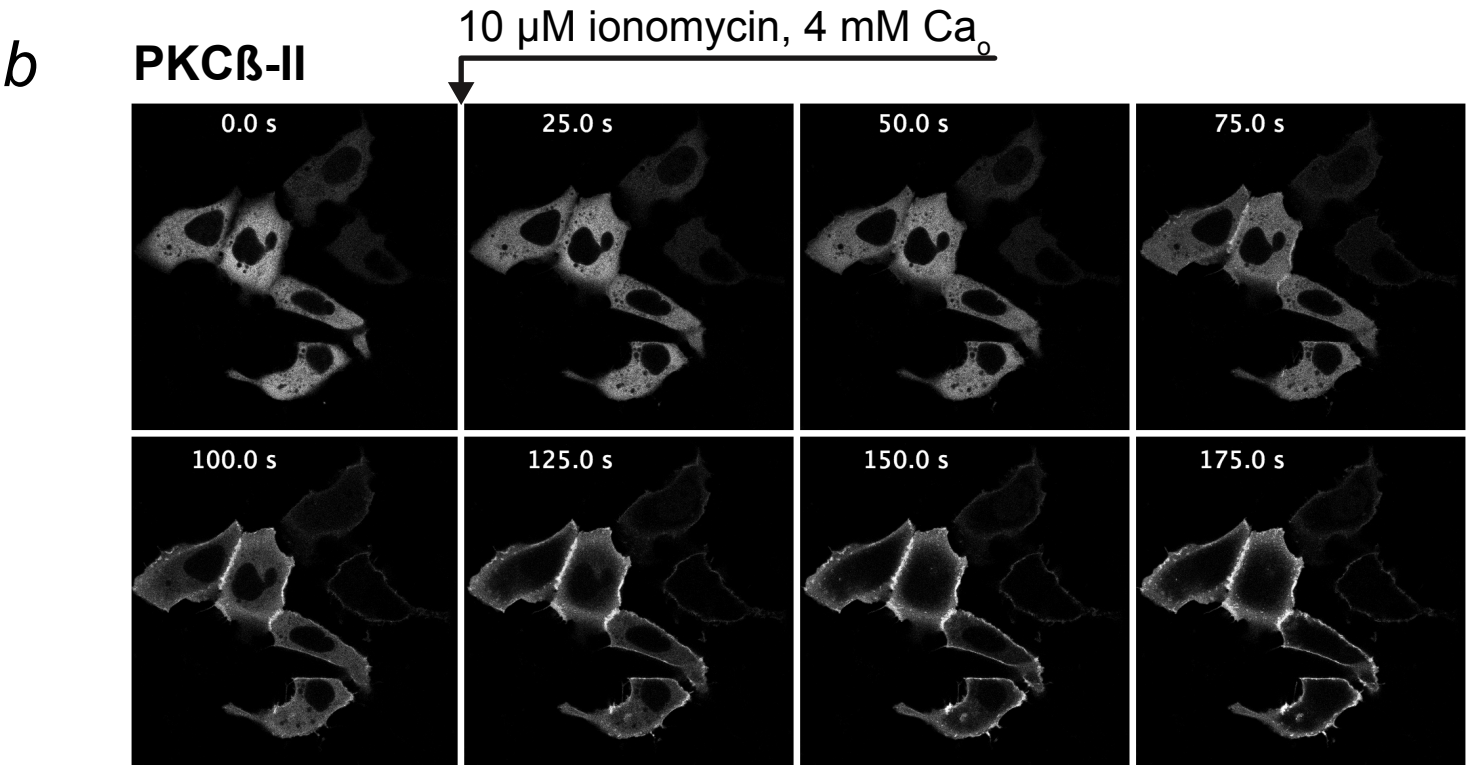

**Ca<sup>2+</sup>-induced C2-domain and PKC $\beta$ -II translocation to the plasma membrane.**  
(a) C2-eYFP translocates to the plasma membrane following treatment with 10  $\mu$ M Ionomycin in 4 mM  $Ca_o$ .  
(b) PKC $\beta$ -II-eYFP targets to the plasma membrane following treatment with 10  $\mu$ M Ionomycin in 4 mM  $Ca_o$ .  
Start of the treatment is marked by the arrow. Times into the experiment are indicated in the individual images.

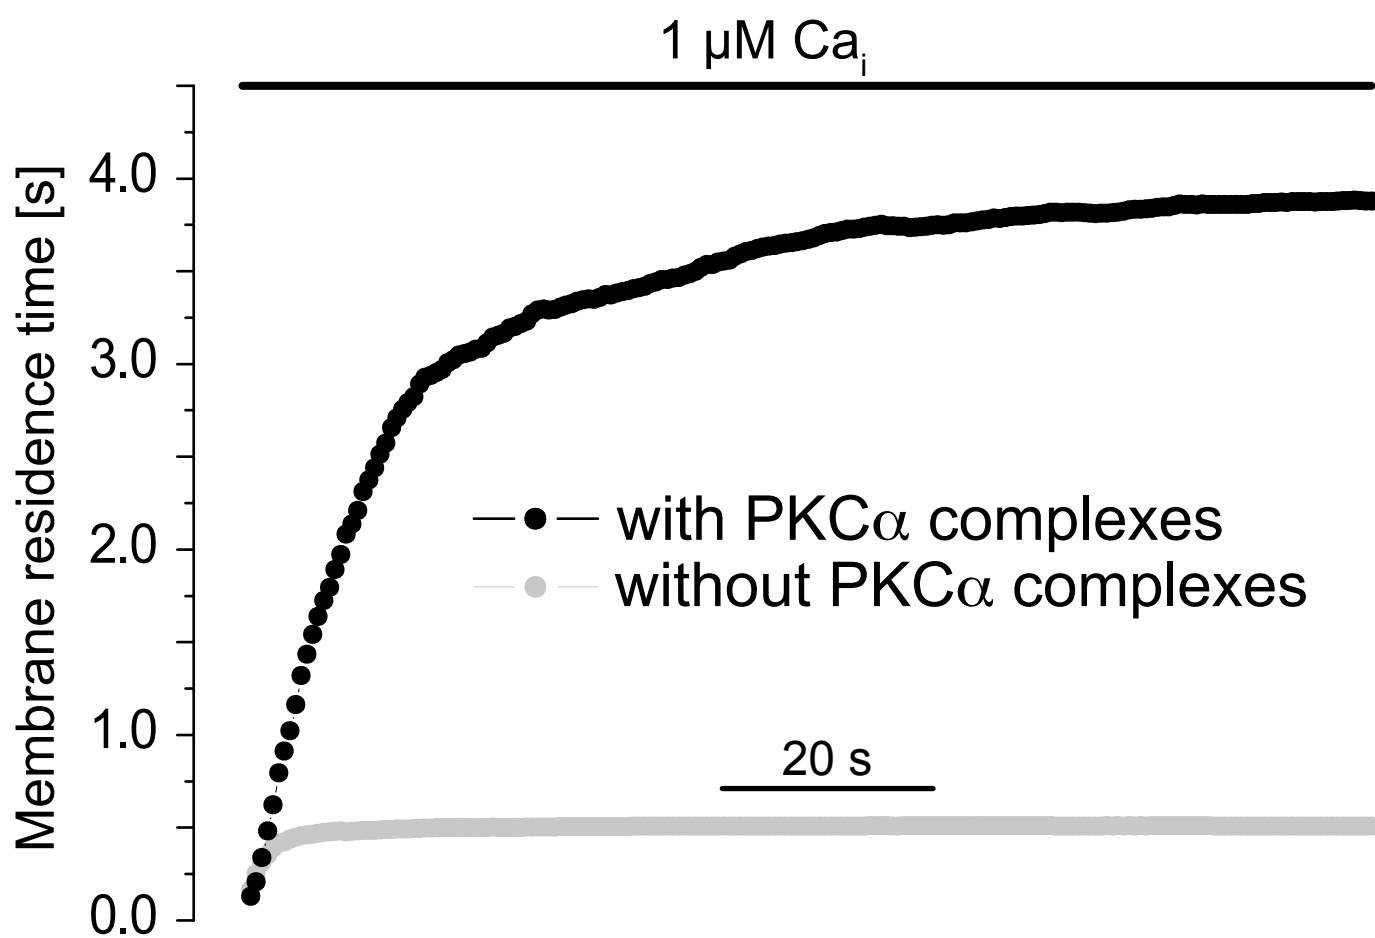

Average membrane residence time of PKC $\alpha$  in simulations using  $\text{Ca}_i=1\mu\text{M}$  with (black circles) and without (grey circles) intermolecular interactions of PKC $\alpha$ .

# Movie 1

snapshots of entire volume modelled

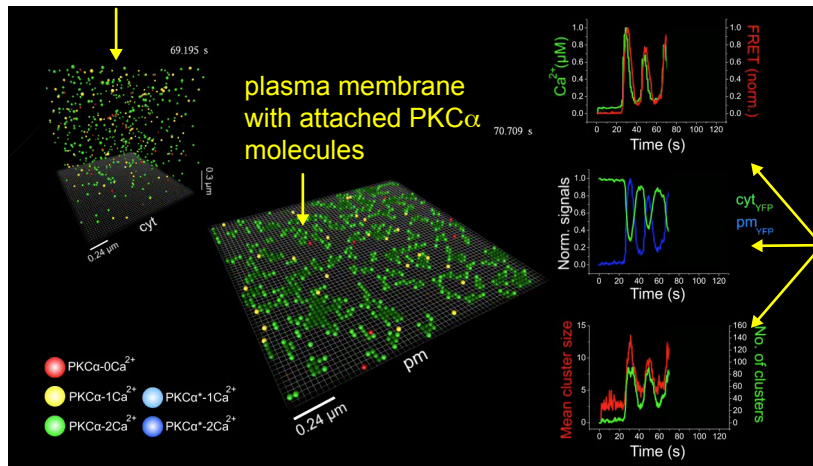

quantities taken from the entire simulation volume as a function of time

**Movie 1:** Simulation of PKC $\alpha$  dynamics for the experimental Ca $^{2+}$  signals of Fig. 1d. **Left:** snapshots of the PKC $\alpha$ -particle distribution at indicated time points. **Middle:** simulated plasma membrane area with PKC $\alpha$ -attachment grid and PKC $\alpha$  molecules attached. Color code of the molecules depicted to the lower left. **Right:** Mean cluster size, no of clusters, cytosolic and plasma membrane fluorescence, [Ca $^{2+}$ ], and FRET $_{app}$  as a function of time.

# Movie 2

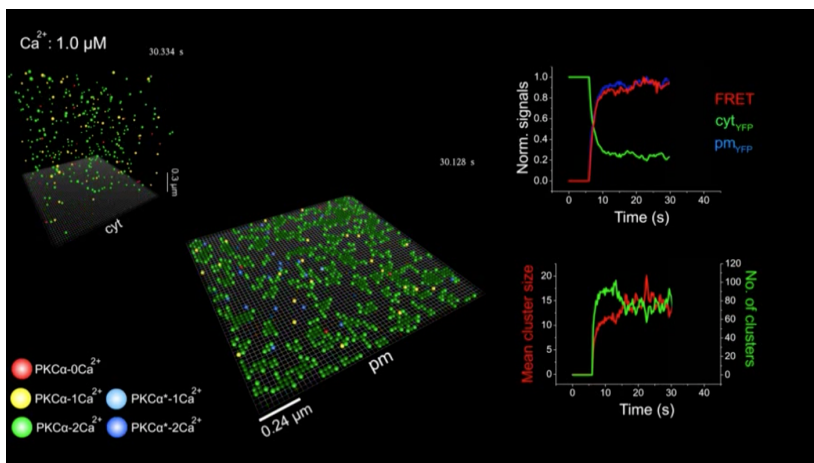

**Movie 2:** Simulation of PKC $\alpha$  dynamics for a prolonged exposure to low Ca $_i$  (1  $\mu$ M). **Left:** snapshots of the PKC $\alpha$ -particle distribution at indicated time points. **Middle:** simulated plasma membrane area with PKC $\alpha$ -attachment grid and PKC $\alpha$  molecules attached. Color code of the molecules depicted to the lower left. **Right:** Mean cluster size, no of clusters, cytosolic and plasma membrane fluorescence, [Ca $^{2+}$ ], and FRET $_{app}$  as a function of time. Colour code follows the axis legends. Note, that the apparent FRET transient (red) only showed a monotonic increase and subsequent plateau.

# Movie 3

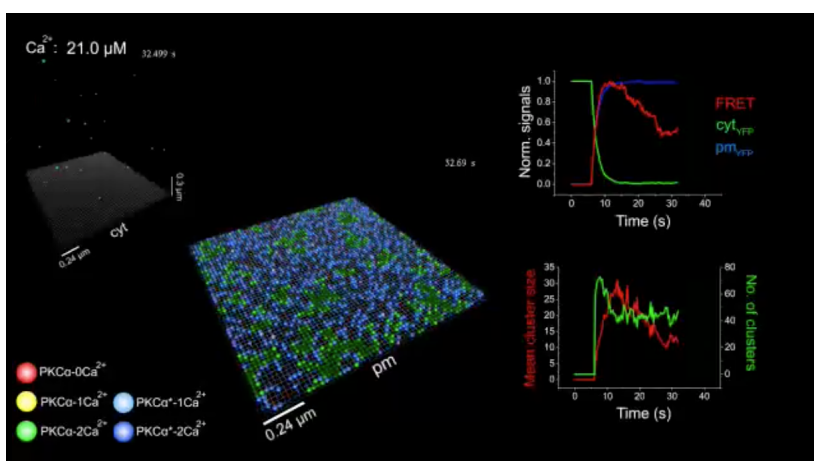

**Movie 3:** Simulation of PKC $\alpha$  dynamics for a prolonged exposure to high Ca $_i$  (21  $\mu$ M). **Left:** snapshots of the PKC $\alpha$ -particle distribution at indicated time points. **Middle:** simulated plasma membrane area with PKC $\alpha$ -attachment grid and PKC $\alpha$  molecules attached. Color code of the molecules depicted to the lower left. **Right:** Mean cluster size, no of clusters, cytosolic and plasma membrane fluorescence, [Ca $^{2+}$ ], and FRET $_{app}$  as a function of time. Colour code follows the axis legends. Note, that the apparent FRET transient (red) showed a transient peak followed by a lower steady-state plateau level.
